# Supplementary material
Source: Research Square preprint supplement (doi:10.21203/rs.3.rs-9919354/v1)
Supplement: Supplementary file 1 [file 3043e5e472a96ee5ed27d34b.docx]

**SUPPLEMENTARY MATERIAL**

**Supplementary Table S1.** Response rates and overall survival according to specific treatment regimens (AZA+VEN, DEC+VEN, LDAC+VEN, AZA alone, DEC alone).

**Supplementary Table S2.** Baseline characteristics after propensity score matching (n = 508 per group), with standardized mean differences.

**Supplementary Figure S1.** Overall survival according to AML type. Kaplan–Meier estimates of OS for VEN-based therapy versus HMA monotherapy in **(A)** de novo AML and **(B)** secondary AML. P-interaction = 0.030.

**Supplementary Figure S2.** Overall survival in sAML according to etiology. Kaplan–Meier estimates of OS for VEN-based therapy versus HMA monotherapy in **(A)** AML evolved from MDS, **(B)** AML evolved from MDS/MPN, **(C)** AML evolved from MPN, and **(D)** t-AML.

**Supplementary Figure S3.** Overall survival according to prior HMA exposure. Kaplan–Meier estimates of OS for VEN-based therapy versus HMA monotherapy in **(A)** HMA-naïve patients and **(B)** patients with prior HMA exposure during an antecedent myeloid disorder.

**Supplementary Figure S4.** Overall survival according to cytogenetic risk (MRC 2010). Kaplan–Meier estimates of OS for VEN-based therapy versus HMA monotherapy in **(A)** favorable-risk, **(B)** intermediate-risk, and **(C)** adverse-risk cytogenetics.

**Supplementary Figure S5.** Overall survival according to molecular subgroups in mutation-positive patients. Kaplan–Meier estimates of OS for VEN-based therapy versus HMA monotherapy in **(A)** *NPM1*-mutated, **(B)** *IDH1*-mutated, **(C)** *IDH2*-mutated, **(D)** *FLT3*-ITD-positive, and **(E)** *TP53*-mutated patients.

**Supplementary Figure S6.** Overall survival after allogeneic stem cell transplantation. Kaplan–Meier estimates of post-transplant OS for patients receiving allo-HSCT in first CRc after VEN-based therapy versus HMA monotherapy.

**Supplementary Figure S7.** Disease-free survival. Kaplan–Meier estimates of DFS among patients achieving CRc, comparing VEN-based therapy versus HMA monotherapy.

**Supplementary Figure S8.** Propensity score–matched analysis. Kaplan–Meier estimates of **(A)** overall survival and **(B)** disease-free survival in the propensity score–matched cohort (n = 508 per group).
