# Supplementary material
Source: Research Square preprint supplement (doi:10.21203/rs.3.rs-9919354/v1)
Supplement: Supplementary file 2 [file 30b5688f32fb5fd66d7057a0.docx]

**Supplementary Table S1. Response rates and overall survival according to specific treatment regimen.**

|  | **VEN-based** | | | **HMA monotherapy** | |  |
| --- | --- | --- | --- | --- | --- | --- |
| **Response** | **AZA + VEN (n = 740)** | **DEC + VEN (n = 31)** | **LDAC + VEN (n = 26)** | **AZA (n = 1,130)** | **DEC (n = 218)** | **P** |
| CRc, n (%) | 487 (65.8) | 18 (58.1) | 8 (30.8) | 233 (20.6) | 37 (17.0) | **<0.001** |
| PR, n (%) | 79 (10.7) | 2 (6.5) | 2 (7.7) | 141 (12.5) | 29 (13.3) |
| Refractory, n (%) | 84 (12.7) | 8 (25.8) | 11 (42.3) | 519 (45.9) | 109 (50.0) |
| Death, n (%) | 80 (10.8) | 3 (9.7) | 5 (19.2) | 237 (21.0) | 43 (19.7) |
|  |  |  |  |  |  |  |
| Median OS, mo (95% CI) | 12.3 (10.8–14.3) | 5.6 (4.2–16.5) | 6.2 (4.2–14.3) | 8.3 (7.5–9.3) | 7.8 (6.2–9.7) | **<0.001** |
| HR (95% CI) | 0.63 (0.56–0.70) | 0.93 (0.64–1.37) | 1.26 (0.83–1.92) | Reference | 0.90 (0.77–1.05) |  |

Data are presented as n (%). Abbreviations: CRc, composite complete remission (CR + CRi); PR, partial remission; OS, overall survival; mo, months; CI, confidence interval; HR, hazard ratio. Evaluable patients only (response not available excluded). HRs from Cox regression with AZA monotherapy as reference. P-values from chi-square test for overall response distribution (response) and log-rank test (OS).
