# Supplementary material
Source: Research Square preprint supplement (doi:10.21203/rs.3.rs-9919354/v1)
Supplement: Supplementary file 3 [file a5bea2b06da83c378c814607.docx]

**Supplementary Table S2. Baseline characteristics after propensity score matching.**

| **Characteristic** | **HMA (n = 508)** | **VEN-based (n = 508)** | ***P*** | ***SMD*** |
| --- | --- | --- | --- | --- |
| Sex, male — n (%) | 306 (60.2) | 287 (56.5) | 0.252 | 0.075 |
| Age group — n (%) |  |  | 1 | 0.000 |
| <75 years | 247 (48.6) | 247 (48.6) |  |  |
| ≥75 years | 261 (51.4) | 261 (51.4) |  |  |
| Age, years — median (range) | 75 (17–90) | 75 (20–91) | 0.14 | * |
| ECOG PS — n (%) |  |  | 1 | 0.000 |
| 0–2 | 478 (94.1) | 478 (94.1) |  |  |
| 3–4 | 30 (5.9) | 30 (5.9) |  |  |
| AML type — n (%) |  |  | 0.34 | 0.066 |
| De novo | 264 (54.2) | 244 (50.9) |  |  |
| Secondary | 223 (45.8) | 235 (49.1) |  |  |
| Extramedullary disease — n (%) | 39 (11.3) | 28 (8.0) | 0.174 | 0.112 |
| Prior HMA — n (%) | 14 (4.3) | 12 (4.1) | 1 | 0.010 |
| WBC category — n (%) |  |  | 1 | 0.000 |
| <15 × 10⁹/L | 325 (64.0) | 325 (64.0) |  |  |
| ≥15 × 10⁹/L | 183 (36.0) | 183 (36.0) |  |  |
| WBC, ×10⁹/L — median (range) | 6.4 (0.1–27.2) | 6.1 (0.2–174) | 0.184 | * |
| Hemoglobin, g/dL — median (range) | 8.8 (4.1–15) | 8.6 (3.7–16) | 0.135 | * |
| BM blasts, % — median (range) | 40 (0–100) | 40 (0–100) | **0.043** | * |
| ***Cytogenetic and molecular features*** |  |  |  |  |
| MRC cytogenetic risk — n (%) |  |  | 1 | 0.000 |
| Low | 7 (1.4) | 7 (1.4) |  |  |
| Intermediate | 333 (65.6) | 333 (65.6) |  |  |
| High | 168 (33.1) | 168 (33.1) |  |  |
| *NPM1* positive — n (%) | 68 (20.2) | 76 (18.5) | 0.625 | 0.043 |
| *FLT3-ITD* positive — n (%) | 34 (9.9) | 44 (10.5) | 0.864 | 0.020 |
| *FLT3-TKD* positive — n (%) | 16 (5.7) | 21 (5.9) | 1 | 0.009 |
| *IDH1* positive — n (%) | 31 (11.4) | 38 (11.1) | 1 | 0.009 |
| *IDH2* positive — n (%) | 47 (17.2) | 62 (18.1) | 0.834 | 0.024 |
| *TP53* positive — n (%) | 73 (14.4) | 83 (16.3) | 0.434 | 0.053 |

Matching was performed using nearest-neighbor propensity score matching (1:1 ratio) on age (≥75 years), cytogenetic risk (MRC 2010), WBC (≥15 × 10⁹/L), and ECOG (3–4). Only HMA patients diagnosed between 2010 and 2020 were eligible for matching. Continuous variables are presented as median (range); categorical variables as n (%). SMD, standardized mean difference; values <0.1 indicate adequate balance. *SMD not calculated for continuous variables presented as medians; matching was performed on their categorical versions, for which SMDs are reported. Bold P-values indicate statistical significance (P < 0.05).
